# Supplementary material for: Self-assembly of a 1D heterotrimetallic Cu(ii)-Sr(ii)-Na(i) propeller-like chiral coordination polymer with ferromagnetic interactions
Source: Royal Society of Chemistry journal article supplement (doi:10.1039/b408205b), 2004-01-01
Supplement: b408205b.doc [file b408205b.doc]

*Electronic Supplementary Information*

Self-assembly of a 1D heterotrimetallic Cu(II)-Sr(II)-Na(I) propeller-like chiral coordination polymer with ferromagnetic interactions

Wenlong Liu, You Song,Yizhi Li, Yang Zou, Dongbin Dang, Chunlin Ni, and Qingjin Meng*

**Figure S1.** Packing of **1** along *c* axis showing the O(5)-H…O(2) hydrogen bonds and the Br…Br interactions

( *d*Br…Br = 3.5735(15) Å ; *d*O(5)…O(2) = 2.729(11) Å)

Thermalgravimetric analyses of complex **1** exhibits that water of crystallization is lost at lower temperature(<63 ℃). The weight loss from 170 to 230℃ corresponds with the lose of three water. The higher dehydration temperature suggests that three water molecules are coordinated to the metal ions. The decomposition temperature of complex **1** is 299℃.

**Figure S2.** Thermogravimetric (TG) curve of complex **1,** heating from 20-400℃ at 10 ℃/min, in air.

Circular dichroism spectra were measured with a Jasco model J-810 spectropolarimeter. Measurements were made on the resulting complex as dispersions of 2 mg in 100 mg of oven-dried KBr. 13-mm diameter disks were made in a standard disk press. The baseline correction was performed with the spectrum of a pure KBr disk, prepared in the same conditions. The displayed absorption spectra result from subtraction of spectrum of a standard KBr disk. Spectra were recorded for the wavelength range 750-200nm for all the disks.

**Figure S3.** Circular dichroism spectra of the coordination polymer ground crystals in KBr pellet.
